# Supplementary material
Source: PubMed Central journal article supplement (PMC2735252)

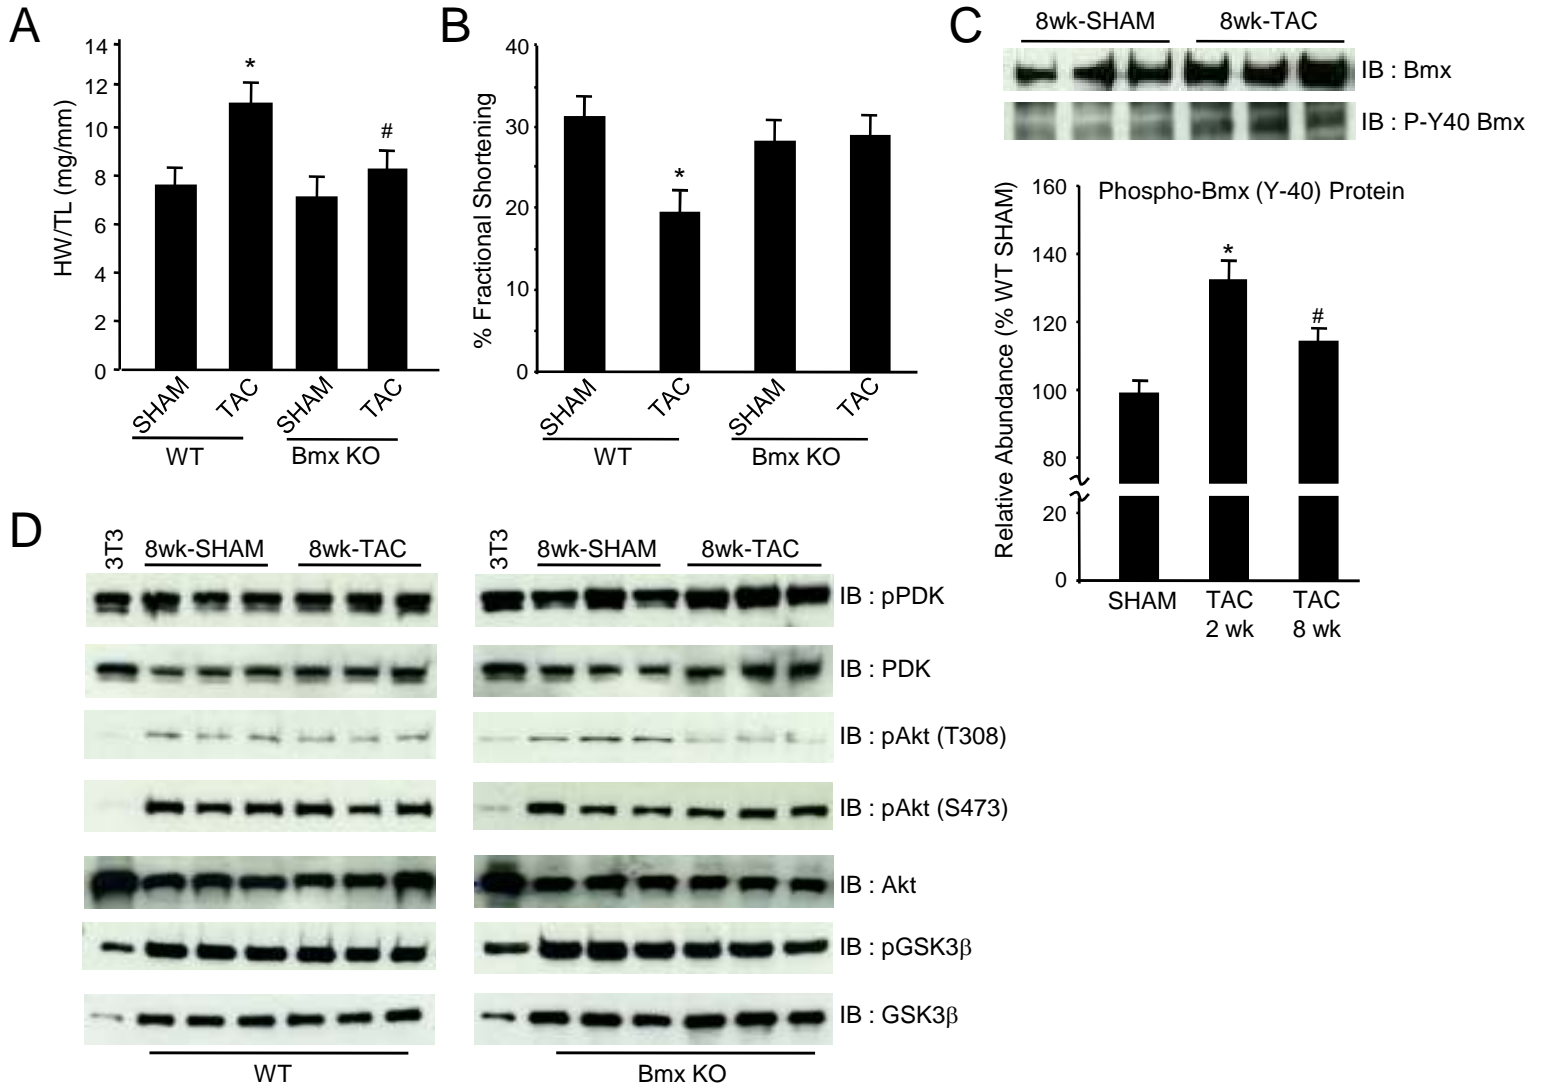

Supplement: NIHMS127187-supplement-1.pdf [file NIHMS127187-supplement-1.pdf]
